# Supplementary material
Source: publisher site journal article supplement (https://www.spandidos-publications.com/4536/downloadSupplementary)
Supplement: Supplementary file 1 [file downloadSupplementary]

## Sheet: Blad1 (2)
Table SIII. Differentially expressed genes upon treatment versus control
Gemcitabine vs control						IFN-B vs control						Combination vs control
	Log2 fold change	P-value	BH.p.value				Log2 fold change	P-value	BH.p.value				Log2 fold change	P-value	BH.p.value
A2m	-2.09	0.0276	0.216			Adm	-1.41	0.0212	0.267			Adm	-1.22	0.025	0.239
Aldoc	-0.643	0.0212	0.194			Aldoa	-0.436	0.0399	0.375			Aldoc	-0.669	0.0171	0.209
Angpt2	-0.825	0.0112	0.124			Aldoc	-0.711	0.0225	0.275			Angpt2	-0.757	0.0184	0.209
Areg	-0.592	0.0163	0.16			Angpt2	-1.01	0.00641	0.164			Areg	-0.509	0.0351	0.275
Atf3	-0.676	0.0186	0.173			Angptl4	-0.723	0.0279	0.316			Bmp2	-0.96	0.00133	0.102
Bmp2	-1.19	0.000175	0.0312			Areg	-0.593	0.029	0.322			Bnip3	-0.927	0.0115	0.193
Bnip3	-0.984	0.00789	0.105			Arg1	-1.47	0.0394	0.375			Bnip3l	-0.576	0.00433	0.132
Bnip3l	-0.635	0.00204	0.0731			Bnip3	-1.09	0.00845	0.197			Cd300a	0.684	0.0162	0.206
Casp9	-0.296	0.0143	0.148			Bnip3l	-0.576	0.00915	0.197			Cdh1	-0.686	0.031	0.266
Ccl4	-0.757	0.0495	0.306			Ccl19	2.63	0.0164	0.251			Cdk6	-0.228	0.0378	0.289
Ccne1	0.546	0.0377	0.256			Cd1d1	1.89	0.00804	0.196			Cdkn1a	-0.764	0.00696	0.162
Cd274	-0.774	0.0104	0.12			Cd36	2.78	0.0034	0.116			Chd9	-0.313	0.0184	0.209
Cd276	0.22	0.025	0.214			Cdkn1a	-1.07	0.0013	0.0943			Clec7a	1.06	0.000881	0.095
Cdh1	-0.856	0.00924	0.117			Cpa3	1.72	0.0147	0.242			Col11a1	1.28	0.0191	0.212
Cdkn1a	-1.12	0.000306	0.0312			Cxcl10	2.36	0.00302	0.115			Col5a1	-1.03	0.0401	0.295
Clec5a	0.538	0.0318	0.233			Cxcl11	2.13	0.00139	0.0943			Col6a3	-0.788	0.0485	0.342
Clec7a	0.866	0.00455	0.0887			Dusp1	-1.06	0.00021	0.0638			Ctsw	0.745	0.0297	0.266
Cpa3	1.38	0.0265	0.214			Dusp5	-0.757	0.02	0.267			Cxcr2	0.891	0.0332	0.267
Ctsw	1.04	0.00375	0.0881			Eomes	0.862	0.0277	0.316			Cybb	0.652	0.0316	0.266
Cxcr2	0.998	0.0187	0.173			Ero1l	-1.58	0.00223	0.113			Dll4	-0.994	0.0337	0.267
Dnmt1	0.257	0.0463	0.298			F2rl1	-0.419	0.0455	0.394			Dtx4	0.635	0.0034	0.122
Dtx4	0.588	0.00585	0.094			Fcer1a	1.76	0.0412	0.377			Dusp1	-0.705	0.0028	0.122
Dusp1	-0.923	0.000262	0.0312			Fgf18	-0.83	0.0152	0.244			Dusp5	-0.688	0.0183	0.209
Dusp5	-0.582	0.0415	0.273			Fstl3	-1.12	0.000866	0.0882			Eif4ebp1	-0.347	0.0229	0.229
Eif4ebp1	-0.431	0.00627	0.0952			Gbp2	3.6	4.27e-05	0.0261			Eno1	-0.338	0.032	0.266
Eno1	-0.348	0.0275	0.216			Gbp3	2.59	0.000323	0.0638			Eomes	0.978	0.00744	0.162
Eomes	1.03	0.00506	0.0909			Glud1	0.172	0.0214	0.267			Ero1l	-1.27	0.00483	0.139
Ero1l	-1.47	0.00156	0.0731			Gzme	-0.667	0.049	0.41			Fcgr4	0.791	0.0201	0.219
Ezh2	0.283	0.0152	0.155			H2-D1	0.617	0.043	0.386			Fgf13	1.69	0.0135	0.197
Fcer1a	1.72	0.0288	0.22			H2-T23	0.414	0.000592	0.0723			Fgf18	-0.946	0.00306	0.122
Fgf13	2.17	0.00234	0.0731			Hk1	-0.547	0.0032	0.115			Fstl3	-0.834	0.00381	0.124
Fgf18	-0.936	0.00329	0.0805			Ier3	-0.866	0.00272	0.115			Glud1	0.176	0.00999	0.192
Fstl3	-0.923	0.00174	0.0731			Ifi35	0.406	0.0368	0.37			Havcr2	0.547	0.0328	0.267
Gzmb	1.72	0.0166	0.161			Ikzf3	0.788	0.0353	0.365			Hck	0.695	0.0408	0.296
H2afx	0.228	0.0407	0.27			Il11	-1.68	0.014	0.241			Hdac4	-0.329	0.0119	0.193
H2-K1	-0.568	0.0157	0.157			Il18bp	1.1	0.00248	0.115			Hk1	-0.412	0.0102	0.192
H2-M3	-0.604	0.0352	0.244			Irf1	0.684	0.0187	0.26			Hk2	-1.42	0.00219	0.112
H2-T23	-0.294	0.00428	0.0887			Irf7	0.914	0.0259	0.304			Ier3	-0.796	0.00217	0.112
Hells	0.34	0.0234	0.205			Itgav	-0.454	0.000417	0.0638			Ifi35	0.34	0.0495	0.344
Hey1	-0.851	0.00474	0.0887			Itpk1	-0.766	0.00136	0.0943			Igf2r	-0.429	0.000928	0.095
Hk1	-0.501	0.00263	0.0731			Jag1	-0.613	0.00934	0.197			Il18bp	0.958	0.00323	0.122
Hk2	-1.41	0.00227	0.0731			Lamc2	-0.854	0.0299	0.326			Itpk1	-0.915	8.33e-05	0.0369
Ier3	-0.67	0.00761	0.105			Lck	0.986	0.0205	0.267			Jag1	-0.746	0.000921	0.095
Ifi203	-0.775	0.033	0.237			Ldha	-0.345	0.0369	0.37			Jag2	-0.46	0.00268	0.122
Igf2r	-0.558	6.91e-05	0.0211			Ldhb	2.36	0.00184	0.102			Lag3	0.746	0.0117	0.193
Irf2	-0.237	0.0142	0.148			Lif	-0.847	0.00459	0.134			Lamb3	-0.863	0.0394	0.295
Itpk1	-0.989	3.5e-05	0.0211			Mxi1	-0.76	0.00646	0.164			Lamc2	-0.862	0.0159	0.206
Jag1	-0.728	0.00114	0.0731			Nlrc5	1.63	0.0175	0.258			Lilra5	1.98	0.000121	0.0369
Jag2	-0.48	0.00194	0.0731			P2ry13	0.834	0.00914	0.197			Mdm2	-0.375	0.00623	0.152
Jak3	-0.263	0.0266	0.214			P4ha1	-0.63	0.0329	0.353			Mlh1	-0.21	0.0486	0.342
Lamb3	-0.82	0.0492	0.306			P4ha2	-1.01	0.00403	0.13			Mx1	0.505	0.0288	0.266
Lamc2	-0.923	0.0106	0.12			Parp12	0.637	0.0156	0.245			Mxi1	-0.613	0.0123	0.193
Lif	-0.55	0.03	0.226			Parp9	0.422	0.0489	0.41			Myd88	0.308	0.0251	0.239
Lilra5	1.43	0.0025	0.0731			Pdk1	-0.733	0.0142	0.241			Ndufa4l2	-1.27	0.0059	0.152
Ltb	1.18	0.0266	0.214			Plod2	-0.861	0.00502	0.139			Nfil3	-0.584	0.00725	0.162
Mdm2	-0.394	0.00442	0.0887			Pms2	-0.181	0.0413	0.377			Nkg7	-1.69	0.0286	0.266
Mmp13	1.23	0.0266	0.214			Pparg	1.51	0.0186	0.26			Notch1	-0.424	0.0214	0.223
Mtor	-0.238	0.00243	0.0731			Psmb10	0.722	0.0139	0.241			Oas1a	0.938	0.0296	0.266
Mxi1	-0.692	0.00571	0.094			Psmb9	1.25	0.0129	0.241			P2ry13	1.01	0.000932	0.095
Ndufa4l2	-1.22	0.00788	0.105			Ptgs2	-1.03	0.0204	0.267			P4ha1	-0.72	0.00851	0.179
Nf1	-0.302	0.00564	0.094			Pvr	-0.551	0.00285	0.115			P4ha2	-1.02	0.0015	0.102
Nfil3	-0.557	0.00984	0.12			Sfrp1	1.31	0.0457	0.394			Pdgfrb	-0.822	0.0245	0.239
Nos2	-1.86	0.00582	0.094			Slc1a5	0.83	0.0177	0.258			Pdk1	-0.661	0.0135	0.197
Notch1	-0.498	0.00842	0.109			Slc2a1	-1.02	0.00446	0.134			Pfkm	0.385	0.0322	0.266
P2ry13	0.898	0.00263	0.0731			Stat2	0.565	0.0256	0.304			Plod2	-0.665	0.0128	0.196
P4ha1	-0.635	0.0179	0.171			Tap1	1.36	0.0102	0.202			Prkaa2	1.38	0.0161	0.206
P4ha2	-1.01	0.00167	0.0731			Tap2	0.915	0.0376	0.37			Pvr	-0.382	0.0153	0.206
Palmd	0.194	0.0397	0.266			Tapbp	0.582	0.0137	0.241			Rad51c	-0.414	0.0146	0.204
Parp4	-0.168	0.0468	0.298			Tbx21	1.16	0.00169	0.102			Rock1	-0.285	0.00186	0.112
Pck2	-0.245	0.0252	0.214			Tnfaip3	-0.337	0.0382	0.37			Rpl23	-0.518	0.0216	0.223
Pdk1	-0.751	0.00608	0.0952			Uba7	0.475	0.0336	0.354			Selp	-1.44	0.0104	0.192
Pfkfb3	-0.633	0.0353	0.244			Vegfa	-1.07	0.0102	0.202			Sfrp1	1.29	0.0302	0.266
Plod2	-0.565	0.0305	0.227			Vegfc	-0.405	0.0455	0.394			Siglecf	1.67	0.0122	0.193
Prkaa2	1.57	0.00711	0.101									Slc2a1	-0.9	0.00501	0.139
Pvr	-0.463	0.00449	0.0887									Slc7a5	-0.382	0.0219	0.223
Rad50	-0.237	0.00941	0.117									Snca	2.1	0.0307	0.266
Rictor	-0.358	0.0483	0.304									Spry4	-0.705	0.006	0.152
Robo4	-1.1	0.0285	0.22									Srebf1	-0.294	0.0375	0.289
Rock1	-0.223	0.0105	0.12									Srp54a	-0.406	0.0112	0.193
Rpl23	-0.635	0.00639	0.0952									Stat2	0.603	0.00956	0.192
Rpl7a	-0.265	0.0118	0.129									Tgfb3	0.456	0.0175	0.209
Rps6kb1	-0.204	0.0235	0.205									Tgfbr1	0.354	0.00124	0.102
S100a8	1.64	0.00117	0.0731									Tlr9	0.813	0.0401	0.295
S100a9	1.61	0.00293	0.0745									Tnfrsf11b	-1.44	0.0207	0.222
Selp	-1.14	0.0355	0.244									Tpm1	0.258	0.0147	0.204
Sfrp4	-1.98	0.0226	0.203									Trim21	0.375	0.0173	0.209
Sfxn1	0.247	0.0456	0.296									Vegfa	-1.1	0.00387	0.124
Siglecf	1.71	0.0106	0.12									Vegfc	-0.361	0.0457	0.328
Slc2a1	-1.14	0.000756	0.066
Snca	2.87	0.00479	0.0887
Spry4	-0.825	0.00189	0.0731
Srebf1	-0.305	0.032	0.233
Srp54a	-0.33	0.0339	0.241
Tbx21	0.953	0.00464	0.0887
Tgfbr1	0.425	0.000222	0.0312
Ticam1	-0.443	0.00192	0.0731
Tnks	-0.296	0.0123	0.132
Tpm1	0.294	0.00657	0.0956
Vegfa	-1.15	0.00281	0.0745

## Sheet: Blad1
	Gemcitabine vs control					IFN-B vs control					Combination vs control
		Log2 fold change	P-value	BH.p.value			Log2 fold change	P-value	BH.p.value			Log2 fold change	P-value	BH.p.value
	A2m	-2.09	0.0276	0.216		Adm	-1.41	0.0212	0.267		Adm	-1.22	0.025	0.239
	Aldoc	-0.643	0.0212	0.194		Aldoa	-0.436	0.0399	0.375		Aldoc	-0.669	0.0171	0.209
	Angpt2	-0.825	0.0112	0.124		Aldoc	-0.711	0.0225	0.275		Angpt2	-0.757	0.0184	0.209
	Areg	-0.592	0.0163	0.16		Angpt2	-1.01	0.00641	0.164		Areg	-0.509	0.0351	0.275
	Atf3	-0.676	0.0186	0.173		Angptl4	-0.723	0.0279	0.316		Bmp2	-0.96	0.00133	0.102
	Bmp2	-1.19	0.000175	0.0312		Areg	-0.593	0.029	0.322		Bnip3	-0.927	0.0115	0.193
	Bnip3	-0.984	0.00789	0.105		Arg1	-1.47	0.0394	0.375		Bnip3l	-0.576	0.00433	0.132
	Bnip3l	-0.635	0.00204	0.0731		Bnip3	-1.09	0.00845	0.197		Cd300a	0.684	0.0162	0.206
	Casp9	-0.296	0.0143	0.148		Bnip3l	-0.576	0.00915	0.197		Cdh1	-0.686	0.031	0.266
	Ccl4	-0.757	0.0495	0.306		Ccl19	2.63	0.0164	0.251		Cdk6	-0.228	0.0378	0.289
	Ccne1	0.546	0.0377	0.256		Cd1d1	1.89	0.00804	0.196		Cdkn1a	-0.764	0.00696	0.162
	Cd274	-0.774	0.0104	0.12		Cd36	2.78	0.0034	0.116		Chd9	-0.313	0.0184	0.209
	Cd276	0.22	0.025	0.214		Cdkn1a	-1.07	0.0013	0.0943		Clec7a	1.06	0.000881	0.095
	Cdh1	-0.856	0.00924	0.117		Cpa3	1.72	0.0147	0.242		Col11a1	1.28	0.0191	0.212
	Cdkn1a	-1.12	0.000306	0.0312		Cxcl10	2.36	0.00302	0.115		Col5a1	-1.03	0.0401	0.295
	Clec5a	0.538	0.0318	0.233		Cxcl11	2.13	0.00139	0.0943		Col6a3	-0.788	0.0485	0.342
	Clec7a	0.866	0.00455	0.0887		Dusp1	-1.06	0.00021	0.0638		Ctsw	0.745	0.0297	0.266
	Cpa3	1.38	0.0265	0.214		Dusp5	-0.757	0.02	0.267		Cxcr2	0.891	0.0332	0.267
	Ctsw	1.04	0.00375	0.0881		Eomes	0.862	0.0277	0.316		Cybb	0.652	0.0316	0.266
	Cxcr2	0.998	0.0187	0.173		Ero1l	-1.58	0.00223	0.113		Dll4	-0.994	0.0337	0.267
	Dnmt1	0.257	0.0463	0.298		F2rl1	-0.419	0.0455	0.394		Dtx4	0.635	0.0034	0.122
	Dtx4	0.588	0.00585	0.094		Fcer1a	1.76	0.0412	0.377		Dusp1	-0.705	0.0028	0.122
	Dusp1	-0.923	0.000262	0.0312		Fgf18	-0.83	0.0152	0.244		Dusp5	-0.688	0.0183	0.209
	Dusp5	-0.582	0.0415	0.273		Fstl3	-1.12	0.000866	0.0882		Eif4ebp1	-0.347	0.0229	0.229
	Eif4ebp1	-0.431	0.00627	0.0952		Gbp2	3.6	4.27e-05	0.0261		Eno1	-0.338	0.032	0.266
	Eno1	-0.348	0.0275	0.216		Gbp3	2.59	0.000323	0.0638		Eomes	0.978	0.00744	0.162
	Eomes	1.03	0.00506	0.0909		Glud1	0.172	0.0214	0.267		Ero1l	-1.27	0.00483	0.139
	Ero1l	-1.47	0.00156	0.0731		Gzme	-0.667	0.049	0.41		Fcgr4	0.791	0.0201	0.219
	Ezh2	0.283	0.0152	0.155		H2-D1	0.617	0.043	0.386		Fgf13	1.69	0.0135	0.197
	Fcer1a	1.72	0.0288	0.22		H2-T23	0.414	0.000592	0.0723		Fgf18	-0.946	0.00306	0.122
	Fgf13	2.17	0.00234	0.0731		Hk1	-0.547	0.0032	0.115		Fstl3	-0.834	0.00381	0.124
	Fgf18	-0.936	0.00329	0.0805		Ier3	-0.866	0.00272	0.115		Glud1	0.176	0.00999	0.192
	Fstl3	-0.923	0.00174	0.0731		Ifi35	0.406	0.0368	0.37		Havcr2	0.547	0.0328	0.267
	Gzmb	1.72	0.0166	0.161		Ikzf3	0.788	0.0353	0.365		Hck	0.695	0.0408	0.296
	H2afx	0.228	0.0407	0.27		Il11	-1.68	0.014	0.241		Hdac4	-0.329	0.0119	0.193
	H2-K1	-0.568	0.0157	0.157		Il18bp	1.1	0.00248	0.115		Hk1	-0.412	0.0102	0.192
	H2-M3	-0.604	0.0352	0.244		Irf1	0.684	0.0187	0.26		Hk2	-1.42	0.00219	0.112
	H2-T23	-0.294	0.00428	0.0887		Irf7	0.914	0.0259	0.304		Ier3	-0.796	0.00217	0.112
	Hells	0.34	0.0234	0.205		Itgav	-0.454	0.000417	0.0638		Ifi35	0.34	0.0495	0.344
	Hey1	-0.851	0.00474	0.0887		Itpk1	-0.766	0.00136	0.0943		Igf2r	-0.429	0.000928	0.095
	Hk1	-0.501	0.00263	0.0731		Jag1	-0.613	0.00934	0.197		Il18bp	0.958	0.00323	0.122
	Hk2	-1.41	0.00227	0.0731		Lamc2	-0.854	0.0299	0.326		Itpk1	-0.915	8.33e-05	0.0369
	Ier3	-0.67	0.00761	0.105		Lck	0.986	0.0205	0.267		Jag1	-0.746	0.000921	0.095
	Ifi203	-0.775	0.033	0.237		Ldha	-0.345	0.0369	0.37		Jag2	-0.46	0.00268	0.122
	Igf2r	-0.558	6.91e-05	0.0211		Ldhb	2.36	0.00184	0.102		Lag3	0.746	0.0117	0.193
	Irf2	-0.237	0.0142	0.148		Lif	-0.847	0.00459	0.134		Lamb3	-0.863	0.0394	0.295
	Itpk1	-0.989	3.5e-05	0.0211		Mxi1	-0.76	0.00646	0.164		Lamc2	-0.862	0.0159	0.206
	Jag1	-0.728	0.00114	0.0731		Nlrc5	1.63	0.0175	0.258		Lilra5	1.98	0.000121	0.0369
	Jag2	-0.48	0.00194	0.0731		P2ry13	0.834	0.00914	0.197		Mdm2	-0.375	0.00623	0.152
	Jak3	-0.263	0.0266	0.214		P4ha1	-0.63	0.0329	0.353		Mlh1	-0.21	0.0486	0.342
	Lamb3	-0.82	0.0492	0.306		P4ha2	-1.01	0.00403	0.13		Mx1	0.505	0.0288	0.266
	Lamc2	-0.923	0.0106	0.12		Parp12	0.637	0.0156	0.245		Mxi1	-0.613	0.0123	0.193
	Lif	-0.55	0.03	0.226		Parp9	0.422	0.0489	0.41		Myd88	0.308	0.0251	0.239
	Lilra5	1.43	0.0025	0.0731		Pdk1	-0.733	0.0142	0.241		Ndufa4l2	-1.27	0.0059	0.152
	Ltb	1.18	0.0266	0.214		Plod2	-0.861	0.00502	0.139		Nfil3	-0.584	0.00725	0.162
	Mdm2	-0.394	0.00442	0.0887		Pms2	-0.181	0.0413	0.377		Nkg7	-1.69	0.0286	0.266
	Mmp13	1.23	0.0266	0.214		Pparg	1.51	0.0186	0.26		Notch1	-0.424	0.0214	0.223
	Mtor	-0.238	0.00243	0.0731		Psmb10	0.722	0.0139	0.241		Oas1a	0.938	0.0296	0.266
	Mxi1	-0.692	0.00571	0.094		Psmb9	1.25	0.0129	0.241		P2ry13	1.01	0.000932	0.095
	Ndufa4l2	-1.22	0.00788	0.105		Ptgs2	-1.03	0.0204	0.267		P4ha1	-0.72	0.00851	0.179
	Nf1	-0.302	0.00564	0.094		Pvr	-0.551	0.00285	0.115		P4ha2	-1.02	0.0015	0.102
	Nfil3	-0.557	0.00984	0.12		Sfrp1	1.31	0.0457	0.394		Pdgfrb	-0.822	0.0245	0.239
	Nos2	-1.86	0.00582	0.094		Slc1a5	0.83	0.0177	0.258		Pdk1	-0.661	0.0135	0.197
	Notch1	-0.498	0.00842	0.109		Slc2a1	-1.02	0.00446	0.134		Pfkm	0.385	0.0322	0.266
	P2ry13	0.898	0.00263	0.0731		Stat2	0.565	0.0256	0.304		Plod2	-0.665	0.0128	0.196
	P4ha1	-0.635	0.0179	0.171		Tap1	1.36	0.0102	0.202		Prkaa2	1.38	0.0161	0.206
	P4ha2	-1.01	0.00167	0.0731		Tap2	0.915	0.0376	0.37		Pvr	-0.382	0.0153	0.206
	Palmd	0.194	0.0397	0.266		Tapbp	0.582	0.0137	0.241		Rad51c	-0.414	0.0146	0.204
	Parp4	-0.168	0.0468	0.298		Tbx21	1.16	0.00169	0.102		Rock1	-0.285	0.00186	0.112
	Pck2	-0.245	0.0252	0.214		Tnfaip3	-0.337	0.0382	0.37		Rpl23	-0.518	0.0216	0.223
	Pdk1	-0.751	0.00608	0.0952		Uba7	0.475	0.0336	0.354		Selp	-1.44	0.0104	0.192
	Pfkfb3	-0.633	0.0353	0.244		Vegfa	-1.07	0.0102	0.202		Sfrp1	1.29	0.0302	0.266
	Plod2	-0.565	0.0305	0.227		Vegfc	-0.405	0.0455	0.394		Siglecf	1.67	0.0122	0.193
	Prkaa2	1.57	0.00711	0.101							Slc2a1	-0.9	0.00501	0.139
	Pvr	-0.463	0.00449	0.0887							Slc7a5	-0.382	0.0219	0.223
	Rad50	-0.237	0.00941	0.117							Snca	2.1	0.0307	0.266
	Rictor	-0.358	0.0483	0.304							Spry4	-0.705	0.006	0.152
	Robo4	-1.1	0.0285	0.22							Srebf1	-0.294	0.0375	0.289
	Rock1	-0.223	0.0105	0.12							Srp54a	-0.406	0.0112	0.193
	Rpl23	-0.635	0.00639	0.0952							Stat2	0.603	0.00956	0.192
	Rpl7a	-0.265	0.0118	0.129							Tgfb3	0.456	0.0175	0.209
	Rps6kb1	-0.204	0.0235	0.205							Tgfbr1	0.354	0.00124	0.102
	S100a8	1.64	0.00117	0.0731							Tlr9	0.813	0.0401	0.295
	S100a9	1.61	0.00293	0.0745							Tnfrsf11b	-1.44	0.0207	0.222
	Selp	-1.14	0.0355	0.244							Tpm1	0.258	0.0147	0.204
	Sfrp4	-1.98	0.0226	0.203							Trim21	0.375	0.0173	0.209
	Sfxn1	0.247	0.0456	0.296							Vegfa	-1.1	0.00387	0.124
	Siglecf	1.71	0.0106	0.12							Vegfc	-0.361	0.0457	0.328
	Slc2a1	-1.14	0.000756	0.066
	Snca	2.87	0.00479	0.0887
	Spry4	-0.825	0.00189	0.0731
	Srebf1	-0.305	0.032	0.233
	Srp54a	-0.33	0.0339	0.241
	Tbx21	0.953	0.00464	0.0887
	Tgfbr1	0.425	0.000222	0.0312
	Ticam1	-0.443	0.00192	0.0731
	Tnks	-0.296	0.0123	0.132
	Tpm1	0.294	0.00657	0.0956
	Vegfa	-1.15	0.00281	0.0745
